# Supplementary material
Source: PubMed Central journal article supplement (PMC3231772)
Supplement: supp_139.1.57_DEV073924TableS1.pdf [file supp_139.1.57_DEV073924TableS1.pdf]

**Table S1. Zebrafish G-protein  $\beta$ -subunit genes**

| G $\beta$ subunit | Accession number |              | Chromosome | Homology to human G $\beta$ subunit |              |
|-------------------|------------------|--------------|------------|-------------------------------------|--------------|
|                   | Nucleotide       | Protein      |            | % identity                          | % similarity |
| gnb1a             | NM_212609        | NP_997774    | 8          | 98                                  | 99           |
| gnb1b             | NM_213481        | NP_998646    | 6          | 97                                  | 98           |
| gnb2              | NM_001013497     | NP_001013515 | 5          | 94                                  | 97           |
| gnb3a             | NM_213202        | NP_998367    | 19         | 67                                  | 83           |
| gnb3b             | NM_001002437     | NP_001002437 | 16         | 79                                  | 88           |
| gnb4a             | XM_680845        | XP_685937    | 2          | 92                                  | 97           |
| gnb4b             | NM_001007452     | NP_001007453 | 11         | 90                                  | 96           |
| gnb5a             | NM_200746        | NP_957040    | 18         | 89                                  | 96           |
| gnb5b             | NM_001080181     | NP_001073650 | 25         | 91                                  | 96           |

Nine zebrafish G-protein  $\beta$ -subunit genes corresponding to the five human isoforms were identified. The table provides the accession numbers for the nucleotide and protein sequences, the chromosome on which they are located, and the levels of conservation with their human counterparts.
