# Supplementary material
Source: PubMed Central journal article supplement (PMC3231772)
Supplement: supp_139.1.57_DEV073924TableS2.pdf [file supp_139.1.57_DEV073924TableS2.pdf]

**Table S2. RT-PCR primers used to amplify the zebrafish *gnb* genes**

|       | Sense primer             | Antisense primer         |
|-------|--------------------------|--------------------------|
| gnb2  | 5'-ACGAAGAGCGACGGTAAAA   | 5'-TGTGTGTTTGG TCAGTTCAG |
| gnb3a | 5'- CTGTCTGTTGGGGAACCTGT | 5'-TCACAAGAGT GTCGCGTTTT |
| gnb3b | 5'-GTGCGTACGGCAGAAAATCT  | 5'-TTGCAGTTAG CAATCCCTGA |
| gnb5a | 5'-CGCACACCTGACACAAACTT  | 5'-TGTGGACAAACTAAGCGATCA |
| gnb5b | 5'-CGCTCGCTTCTTCTTCTT    | 5'-ACGCCATCCC ATAATACCAA |
